# Supplementary material
Source: publisher figshare collection journal article supplement (https://asha.figshare.com/articles/dataset/_/20779294)

**Supplemental Material S2.** Boxplots for the results in the reading test and in all Russian Test of Phonological Processing (RuToPP) tests.

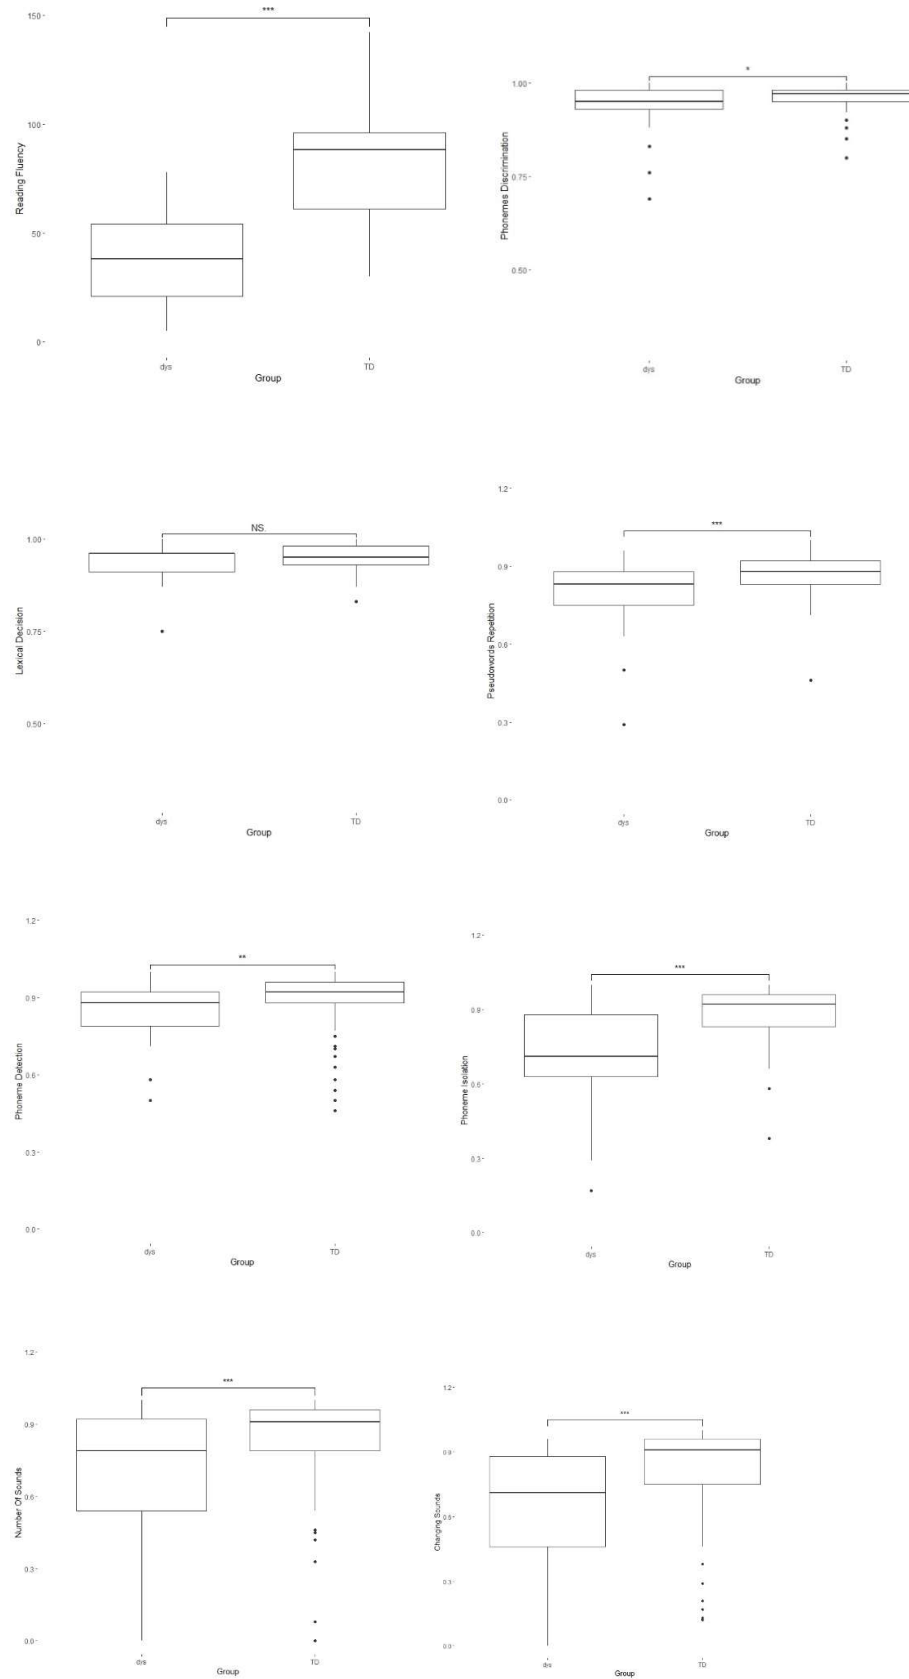

Supplement: Supplementary file 2 [file 1]
